# Supplementary material
Source: MDPI journal article supplement (https://www.mdpi.com/1424-2818/14/3/198)
Supplement: s1 [file s1]

**Supplementary Table S1.** List of valid species of *Zosime* Boeck, 1873 with some of the morphological features based on females.

| Species                                         | A1<br>seg. | A2 exp<br>setal<br>formula | Setal formula (exp/enp) - female |                     |                        |                     | P5 -female     |                         |                       | CR<br>L/W<br>ratio |
|-------------------------------------------------|------------|----------------------------|----------------------------------|---------------------|------------------------|---------------------|----------------|-------------------------|-----------------------|--------------------|
|                                                 |            |                            | P1                               | P2                  | P3                     | P4                  | P5             | exp,<br>surface<br>seta | exp &<br>enp          |                    |
| <i>Z. anneae</i> Koller & George, 2011          | 8          | 1.1.4                      | 0.1.123/<br>1.121                | 1.1.223/<br>1.1.121 | 1.1.223/<br>1.1.121    | 1.1.223/<br>1.1.121 | 4/4            | present                 | fused                 | 4                  |
| <i>Z. carsteni</i> Pointner, 2017               | 8          | 1.1.3                      | 0.1.123/<br>1.121                | 0.1.223/<br>1.1.021 | 1.1.223/<br>1.1.121    | 1.1.223/<br>1.1.121 | 4/4            | absent                  | separate              | 1.8                |
| <i>Z. eliasi</i> Pointner, 2017                 | 8          | 1.1.3                      | 0.1.123/<br>1.111                | 1.1.223/<br>1.1.121 | 1.1.223/<br>1.1.121    | 1.1.223/<br>1.1.121 | 4/4            | present                 | fused                 | 4                  |
| <i>Z. gymnokosmosa</i> Kim J.G. & Lee J., 2019  | 8          | 1.1.4                      | 0.1.122/<br>1.111                | 1.1.222/<br>1.1.111 | 1.1.222/<br>1.1.111    | 1.1.222/<br>1.1.111 | 4/4            | present                 | fused                 | 2.1                |
| <i>Z. atlantica</i> Bodin, 1968                 | 7          | 1.1.3                      | 0.1.123/<br>1.111                | 1.1.223/<br>1.1.121 | 1.1.223/<br>1.1.121    | 1.1.223/<br>1.1.121 | 4/4            | present                 | fused                 | 2.2                |
| <i>Z. changi</i> Kim J.G. & Lee J., 2019        | 7          | 1.1.4                      | 0.1.122/<br>1.111                | 1.1.222/<br>1.1.121 | 1.1.222/<br>1.1.121    | 1.1.222/<br>1.1.021 | 4/2            | present                 | fused                 | 1.6                |
| <i>Z. incrassata bathybia</i> Bodin, 1968       | 7          | 1.0.3                      | 0.1.122/<br>1.121                | 1.1.223/<br>1.1.121 | 1.1.323/<br>1.1.221    | 1.1.323/<br>1.1.121 | 4/3            | absent                  | separate              | 1.2                |
| <i>Z. incrassata incrassata</i> Sars G.O., 1910 | 7          | 1.0.2                      | 0.1.122/<br>1.121                | 1.1.223/<br>1.1.121 | 1.1.323/<br>1.1.221    | 1.1.323/<br>1.1.121 | 4/3            | absent                  | separate              | 1.1                |
| <i>Z. montagnai</i> sp. nov.                    | 7          | 1.1.3                      | 0.1.123/<br>1.220                | 1.1.223/<br>1.1.121 | 1.1.223/<br>1.1.121    | 1.1.223/<br>1.1.120 | 4/2            | absent                  | fused                 | 3                  |
| <i>Z. paratypica</i> Becker & Schrieffer, 1979  | 7          | 1.1.4                      | 0.1.123/<br>1.121                | 1.1.223/<br>1.1.121 | 1.1.223/<br>1.1.121    | 1.1.223/<br>1.1.121 | 4/3<br>or<br>4 | present                 | fused                 | 4                  |
| <i>Z. reyssi</i> Dinet, 1974                    | 7          | 1.0.2                      | 0.1.122/<br>1.020                | 1.1.223/<br>1.1.121 | 1.1.323/<br>1.1.1(2)21 | 1.1.323/<br>1.1.121 | 4/4            | absent                  | partially<br>separate | 1.2                |
| <i>Z. thistlei</i> sp. nov.                     | 7          | 1.1.4                      | 0.1.123/<br>0.111                | 1.1.223/<br>1.1.121 | 1.1.223/<br>1.1.121    | 1.1.223/<br>1.1.121 | 4/3            | absent                  | fused                 | 1.2                |
| <i>Z. valida</i> Sars G.O., 1919                | 7          | 1.1.4                      | 0.1.122/<br>1.111                | 1.1.223/<br>1.1.121 | 1.1.223/<br>1.1.121    | 1.1.223/<br>1.1.121 | 4/2            | present                 | fused                 | 1.7                |
| <i>Z. bathyalis</i> Por, 1967                   | 6          | 0.1.5                      | 0.1.122/<br>1.111                | 1.1.222/<br>1.1.121 | 1.1.222/<br>1.1.120    | 1.1.222/<br>1.1.120 | 4/4            | present                 | fused                 | 2.3                |
| <i>Z. bergensis</i> Drzycimski, 1968            | 6          | 1.1.3                      | 0.1.123/<br>1.111                | 1.1.223/<br>1.1.121 | 1.1.223/<br>1.1.121    | 1.1.223/<br>1.1.121 | 4/3            | present                 | fused                 | 3.3                |
| <i>Z. comata</i> Kim J.G. & Lee J., 2019        | 6          | 1.1.4                      | 0.1.122/<br>1.111                | 1.1.222/<br>1.1.121 | 1.1.222/<br>1.1.121    | 1.1.222/<br>1.1.101 | 4/4            | present                 | fused                 | 1.8                |

|                                                                    |   |         |                      |                     |                     |                     |     |         |       |     |
|--------------------------------------------------------------------|---|---------|----------------------|---------------------|---------------------|---------------------|-----|---------|-------|-----|
| <b><i>Z. destituta</i> Kim<br/>J.G., Jung &amp; Yoon,<br/>2016</b> | 6 | 1.1.4   | 0.1.122/<br>1.111    | 1.1.223/<br>1.1.121 | 1.1.223/<br>1.1.121 | 1.1.223/<br>1.1.021 | 4/2 | present | fused | 1.8 |
| <b><i>Z. erythraea</i> Por,<br/>1967</b>                           | 6 | unknown | 0.0.122(<br>3)/1.111 | 1.1.223/<br>1.1.121 | 1.1.223/<br>1.1.121 | 1.1.223/<br>1.1.121 | 4/4 | present | fused | 4   |
| <b><i>Z. gisleni</i> Lang,<br/>1948</b>                            | 6 | unknown | 0.1.123/<br>1.121    | 1.1.223/<br>1.1.121 | 1.1.223/<br>1.1.121 | 1.1.223/<br>1.1.121 | 4/3 | present | fused | 3   |
| <b><i>Z. major</i> Sars<br/>G.O., 1919</b>                         | 6 | 1.1.3   | 0.1.123/<br>1.121    | 1.1.223/<br>1.1.121 | 1.1.223/<br>1.1.121 | 1.1.223/<br>1.1.121 | 4/4 | present | fused | 3   |
| <b><i>Z. mediterranea</i><br/>Lang, 1948</b>                       | 6 | 1.1.3   | 0.1.123/<br>1.111    | 1.1.223/<br>1.1.121 | 1.1.223/<br>1.1.121 | 1.1.223/<br>1.1.121 | 4/4 | present | fused | 2   |
| <b><i>Z. pacifica</i> Fiers,<br/>1991</b>                          | 6 | 1.1.4   | 0.1.123/<br>1.121    | 1.1.223/<br>1.1.121 | 1.1.223/<br>1.1.121 | 1.1.223/<br>1.1.121 | 4/2 | present | fused | 2   |
| <b><i>Z. paramajor</i><br/>Bodin, 1968</b>                         | 6 | 1.1.4   | 0.1.122/<br>1.111    | 1.1.223/<br>1.1.121 | 1.1.223/<br>1.1.121 | 1.1.223/<br>1.1.121 | 4/4 | present | fused | 2.9 |
| <b><i>Z. tunnelli</i> sp. nov.</b>                                 | 6 | 1.1.3   | 0.1.123/<br>1.111    | 1.1.223/<br>1.1.111 | 1.1.223/<br>1.1.121 | 1.1.223/<br>1.1.120 | 5/4 | absent  | fused | 1.5 |
| <b><i>Z. typica</i> Boeck,<br/>1873</b>                            | 6 | 1.1.3   | 0.1.123/<br>1.121    | 1.1.223/<br>1.1.121 | 1.1.223/<br>1.1.121 | 1.1.223/<br>1.1.121 | 4/3 | present | fused | 2.6 |
