# Supplementary material
Source: MDPI journal article supplement (https://www.mdpi.com/1424-2818/14/3/198)
Supplement: s1 [file s1]

**Supplementary Table S3.** NCBI uploaded sequences list of Zosimeidae and their length (bp).

| Data name                                  | mtCOI | cytb | 18s  | 28s | H3  | Reference                              |
|--------------------------------------------|-------|------|------|-----|-----|----------------------------------------|
| <i>Zosime atlantica</i> SR 637             | 700   |      |      |     |     | Rossel,S. & Martinez<br>Arbizu,P. 2019 |
| <i>Zosime atlantica</i> SR 638             | 722   |      |      |     |     |                                        |
| <i>Zosime atlantica</i> DP 288             | 647   |      |      |     |     |                                        |
| <i>Zosime atlantica</i> DP 289             | 703   |      |      |     |     |                                        |
| <i>Zosime atlantica</i> DP 290             | 690   |      |      |     |     |                                        |
| <i>Zosime</i> sp. DZMB064                  | 658   |      | 1689 | 888 | 322 | Khodami, S. et al. 2017<br>(retracted) |
| <i>Zosime</i> cf. <i>atlantica</i> 8641011 |       | 415  | 740  |     |     | Easton,E.E. & Thistle,D.<br>2016       |
| <i>Zosime</i> cf. <i>atlantica</i> 8581006 |       | 416  | 740  |     |     |                                        |
| <i>Zosime</i> cf. <i>atlantica</i> 6681029 |       | 415  | 740  |     |     |                                        |
| <i>Zosime</i> cf. <i>atlantica</i> 6311021 |       | 416  | 740  |     |     |                                        |
| <i>Zosime</i> cf. <i>atlantica</i> 5721014 |       | 415  | 740  |     |     |                                        |
| <i>Zosime</i> cf. <i>atlantica</i> 5651008 |       | 415  | 740  |     |     |                                        |
| <i>Zosime</i> cf. <i>atlantica</i> 5441016 |       | 415  | 740  |     |     |                                        |
| <i>Zosime</i> cf. <i>atlantica</i> 4581009 |       | 415  | 740  |     |     |                                        |
| <i>Zosime</i> cf. <i>atlantica</i> 4311017 |       | 415  | 740  |     |     |                                        |
| <i>Zosime</i> cf. <i>atlantica</i> 4311016 |       | 415  | 740  |     |     |                                        |
| <i>Zosime</i> cf. <i>atlantica</i> 4311015 |       | 335  | 740  |     |     |                                        |
| <i>Zosime</i> cf. <i>atlantica</i> 4111008 |       | 335  | 740  |     |     |                                        |
| <i>Zosime</i> cf. <i>atlantica</i> 3421004 |       | 415  | 740  |     |     |                                        |
| <i>Zosime</i> cf. <i>atlantica</i> 3381021 |       | 415  | 740  |     |     |                                        |
| <i>Zosime</i> cf. <i>atlantica</i> 3181005 |       | 415  | 740  |     |     |                                        |
| <i>Pseudozosime</i> sp. 4151011            |       | 415  | 740  |     |     |                                        |
| <i>Pseudozosime</i> sp. 4151005            |       | 415  | 740  |     |     |                                        |
| <i>Zosimeidae</i> sp. 5651010              |       | 415  | 740  |     |     |                                        |
| <i>Zosimeidae</i> sp. 5351008              |       | 338  | 740  |     |     |                                        |
