# Supplementary material
Source: MDPI journal article supplement (https://www.mdpi.com/1424-2818/14/3/198)
Supplement: s1 [file s1]

**Supplementary Table S2.** GenBank numbers of sequences used in phylogenetic analysis in this study.

| Family                                    | Species name<br>(Sequence name)  | Accession<br>no. | Reference                                  |
|-------------------------------------------|----------------------------------|------------------|--------------------------------------------|
| <b>Ectinosomatidae</b><br>Sars G.O., 1903 | <i>Bradya</i> sp. (RJH-2004)     | AY627016         | Huys, R. et al. 2006 [1]                   |
|                                           | <i>Parabradya dilatata</i>       | MF077759         | Khodami, S. et al. 2017 (retracted)        |
|                                           | <i>Bradya</i> sp. (DZMB037)      | MF077716         |                                            |
| <b>Zosimeidae</b> Seifried, 2003          | <i>Zosime</i> sp.                | MF077717         |                                            |
| <b>Idyanthidae</b> Lang, 1948             | <i>Idyanthidae</i> sp.           | MF077746         |                                            |
| <b>Aegisthidae</b> Giesbrecht, 1893       | <i>Aegisthidae</i> sp. (DZMB373) | MF077775         |                                            |
|                                           | <i>Aegisthidae</i> sp. (DZMB479) | MF077693         |                                            |
|                                           | <i>Pontostratiotes</i> sp.       | MF077757         |                                            |
|                                           | <i>Cerviniopsis</i> sp.          | MF077773         |                                            |
|                                           | <i>Cerviniopsis longicaudata</i> | MF077767         |                                            |
| <b>Tisbidae</b> Stebbing, 1910            | <i>Tisbe</i> sp. (DZMB496)       | MF077758         |                                            |
|                                           | <i>Volkmannia attenuata</i>      | MF077776         |                                            |
|                                           | <i>Tisbe</i> sp. (JSL-2009)      | FJ713566         | Chullasorn, S. et al. 2011 [2]             |
| <b>Tegastidae</b> Sars G.O., 1904         | <i>Tegastes</i> sp.1             | EU380286         | Huys, R. et al. 2009 [3]                   |
|                                           | <i>Tegastes</i> sp.2             | EU380287         |                                            |
| <b>Peltidiidae</b> Claus, 1860            | <i>Alteuthellopsis</i> sp.       | EU380289         |                                            |
|                                           | <i>Peltidium</i> sp.             | EU380288         |                                            |
|                                           | <i>Peltidium quinquesetosum</i>  | MT002905         | Lim, B. et al. 2020 [4]                    |
| <b>Harpacticidae</b> Dana, 1846           | <i>Tigriopus californicus</i>    | AF363306         | Oakley, T.H. and Cunningham, C.W. 2002 [5] |
|                                           | <i>Tigriopus koreanus</i> (M,F)  |                  | Personal acquisition (Yeom, J.)            |

- Huys, R.; Llewellyn-Hughes, J.; Olson, P.D.; Nagasawa, K. Small subunit rDNA and Bayesian inference reveal *Pectenophilus ornatus* (Copepoda incertae sedis) as highly transformed Mytilicolidae, and support assignment of Chondracanthidae and Xarifiidae to Lichomolgoidea (Cyclopoida). *Biol. J. Linn. Soc.* **2006**, *87*, 403–425.
- Chullasorn, S.; Dahms, H.U.; Lee, K.W.; Ki, J.S.; Schizas, N.; Kangtia, P.; Park, H.G.; Lee, J.S. Description of *Tisbe alaskensis* sp. nov. (Crustacea: Copepoda) combining structural and molecular traits. *Zool. Stud.* **2011**, *50*, 103–117.
- Huys, R.; Mackenzie-Dodds, J.; Llewellyn-Hughes, J. Cancrincolidae (Copepoda, Harpacticoida) associated with land crabs: a semiterrestrial leaf of the ameerid tree. *Mol. Phylogenetics Evol.* **2009**, *51*, 143–156.
- Lim, B.J.; Bang, H.W.; Moon, H.; Back, J. Integrative description of *Diosaccus koreanus* sp. nov. (Hexanauplia, Harpacticoida, Miraciidae) and integrative information on further Korean species. *ZooKeys*, **2020**, *927*, 1–35.
- Oakley, T.H.; Cunningham, C.W. Molecular phylogenetic evidence for the independent evolutionary origin of an arthropod compound eye. *Proc. Natl. Acad. Sci. USA* **2002**, *99*, 1426–1430.
